# Supplementary material for: Impact data bases application for natural and technological risk management
Source: Copernicus journal article supplement (doi:10.5194/nhess-2019-264), 2019-08-20
Supplement: Supplementary file [file nhess-2019-264-AC1-supplement.pdf]

We are grateful to the Referee #2 for the interest to our study and high estimation of our research quality.

We will definitely be consistent in writing word “database” in the final version of the paper.

Speaking about our understanding on “impact database”, we consider that EMERCOM database about natural and technological events in Russia, which contains the information about event date, location, parameters, its social and economic consequences including information about casualties and damage to different elements at risk, as well as optionally information on emergency operations and used forces and resources, may be called as “impact database”. To some extent the EMERCOM impact database on events of different origin is similar to Earthquake Impact Databases (<http://www.ceqid.org/CEQID/Home.aspx>; <https://earthquake-report.com/2018/02/10/earthquake-impact-database-2018>).
