# Supplementary material for: Impact data bases application for natural and technological risk management
Source: Copernicus journal article supplement (doi:10.5194/nhess-2019-264), 2019-08-20
Supplement: Supplementary file [file nhess-2019-264-AC2-supplement.pdf]

**LIST OF RESPONSES TO THE REVIEWERS COMMENTS**  
**on “Impact databases application for natural and technological risk management”**

**Anonymous Referee #1**

Received and published: 12 September 2019

**COMMENTS FOR THE AUTHORS:**

13. Does the author give proper credit to previous and/or related work, and does he/she indicate clearly his/her own contribution?

Yes, it is. Some additional references are possible to include. (for examp. Rangelov B., 2011. Natural Hazards – nonlinearities and assessment., Acad. Publ. House (BAS), ISBN 978-954-332-419-7, 327 pp.)

18. Is there any part of the paper (title, abstract, main text, formulae, symbols, figures and their captions, tables, list of references, appendixes) that needs to be clarified, reduced, added, combined, or eliminated?

In the list of References could be added some publications which is possible to be used for extended research (for examp. B. Rangelov., A. Frantsova., 2017. Multihazards early warnings. Research, models and Bulgarian expertise., LAMBERT Academic Publishing., Saarbrücken, 224 pp. ISBN: 978-620-2-07727-9 and Paskaleva I., B. Rangelov. 2015. Lessons learned by recently happened natural disasters and future research needs., In “Engaging the Public to Fight the Consequences of Terrorism and Disasters.” Eds. I. Apostol, J. Mamasaklihsi, D. Subotta, D. Reimer. NATO Sci. for Peace and Security, E: Human and Societal Dynamics, vol. 120., IOS Press., 257-268 pp.)

**Evaluation synthesis**

The reference list is dominated by Russian publications. Some additional references are possible to be included. (for examp. Rangelov B., 2011. Natural Hazards – nonlinearities and assessment., Acad. Publ. House (BAS), ISBN 978-954-332-419-7, 327 pp.) to the section where the nonlinear effects are described.

In the list of References could be added some publications which is possible to be used for extended research (for examp. B. Rangelov., A. Frantsova., 2017. Multihazards early warnings. Research, models and Bulgarian expertise., LAMBERT Academic Publishing., Saarbrücken, 224 pp. ISBN: 978-620-2-07727-9 and Paskaleva I., B. Rangelov. 2015. Lessons learned by recently happened natural disasters and future research needs., In “Engaging the Public to Fight the Consequences of Terrorism and Disasters.” Eds. I. Apostol, J. Mamasaklihsi, D. Subotta, D. Reimer. NATO Sci. for Peace and Security, E: Human and Societal Dynamics, vol. 120., IOS Press., 257-268 pp.)

In the list of References have to be added some publications which is possible to be used for extended research on the topic presented by the paper (for examp. B. Rangelov., A. Frantsova., 2017. Multihazards early warnings. Research, models and Bulgarian expertise., LAMBERT Academic Publishing., Saarbrücken, 224 pp. ISBN: 978-620-2-07727-9

Paskaleva I., B. Rangelov. 2015. Lessons learned by recently happened natural disasters and future research needs., In “Engaging the Public to Fight the Consequences of Terrorism and Disasters.” Eds. I. Apostol, J. Mamasaklihsi, D. Subotta, D. Reimer. NATO Sci. for Peace and Security, E: Human and Societal Dynamics, vol. 120., IOS Press., 257-268 pp.)

Rangelov B., 2011. Natural Hazards – nonlinearities and assessment., Acad. Publ. House (BAS), ISBN 978-954-332-419-7, 327 pp.

**Answer:** The authors analyzed the recent results published in the papers recommended by Referee #1 and the corresponding references will be made in the final version of the manuscript.

**Anonymous Referee #2**

Received and published: 19 September 2019

**COMMENTS FOR THE AUTHORS:**

Specific comments I had a bit of difficulty in understanding the definition of impact databases? I would prefer to at least mention what the author means by impact databases? In the title, the author writes data bases, whereas in abstract databases (be consistent!!).

**Answer:** The authors will be consistent in writing word “database” in the final version of the paper.

For better understanding of “impact database” the links to similar impact databases will be given in the final version of the manuscript.
